# Supplementary material for: Vaccination Coverage and Associated Factors of COVID-19 Uptake in Adult Primary Health Care Users in Greece
Source: MDPI journal article supplement (doi:10.3390/healthcare11030341), 2023-01-24
Supplement: s1 [file s1]

# SUPPL. TABLES

**Table S1. Correlation of demographic and health status factors parameters with COVID-19 vaccination uptake.**

| Parameters                        | Decision to vaccinate |                  |
|-----------------------------------|-----------------------|------------------|
|                                   | r Value               | P Value          |
| Age                               | <b>-0.14</b>          | <b>&lt;0.001</b> |
| Females versus males              | -0.022                | 0.585            |
| Married vs Single                 | -0.08                 | 0.094            |
| Lower education ( $\leq 6$ years) | -0.07                 | 0.139            |
| <b>Health status factors</b>      |                       |                  |
| Current Smoking                   | 0.02                  | 0.601            |
| Comorbidities ( $\geq 1$ )        | -0.07                 | 0.082            |
| Comorbidities ( $\geq 2$ )        | 0.10                  | 0.800            |
| COPD                              | 0.04                  | 0.386            |
| Asthma                            | -0.02                 | 0.553            |
| Diabetes type 2                   | <b>0.08</b>           | <b>0.043</b>     |
| Coronary Artery Disease           | -0.07                 | 0.070            |
| Stroke/TIA                        | -0.06                 | 0.156            |
| Cancer                            | -0.04                 | 0.296            |
| Inflammatory Arthritis            | <b>-0.08</b>          | <b>0.036</b>     |
| Low self-rated health             | 0.029                 | 0.479            |

**Table S2. Correlation of Knowledge, Attitudes and Beliefs about COVID-19 vaccination with COVID-19 vaccination uptake.**

| Parameters                                                                            | Decision to vaccinate |                  |
|---------------------------------------------------------------------------------------|-----------------------|------------------|
|                                                                                       | r Value               | P Value          |
| Information insufficiency                                                             | <b>-0.212</b>         | <b>&lt;0.001</b> |
| Fear of vaccine side effects                                                          | <b>-0.167</b>         | <b>&lt;0.001</b> |
| Conspiracy beliefs                                                                    | -0.06                 | 0.169            |
| High perceived efficacy of vaccine                                                    | <b>0.151</b>          | <b>&lt;0.001</b> |
| Early vaccine distribution                                                            | <b>-0.225</b>         | <b>&lt;0.001</b> |
| Pregnancy                                                                             | 0.05                  | 0.251            |
| No need due to previous COVID-19 infection                                            | <b>-0.152</b>         | <b>&lt;0.001</b> |
| Belief that infection confers much greater immunity than a vaccine                    | <b>-0.218</b>         | <b>&lt;0.001</b> |
| Perception of low susceptibility to disease or possible infection would not be severe | -0.06                 | 0.148            |
| Family influence                                                                      | -0.044                | 0.305            |
| Belief that vaccines development is a way for pharmaceutical companies to make profit | 0.013                 | 0.773            |
| Against vaccinations in general                                                       | <b>-0.139</b>         | <b>0.001</b>     |
| Fear of infection                                                                     | <b>0.101</b>          | <b>0.019</b>     |
| Previous flu vaccination (in high risk population)                                    | <b>0.136</b>          | <b>0.001</b>     |
| Vulnerable group                                                                      | <b>0.09</b>           | <b>0.038</b>     |
| Living with vulnerable groups                                                         | <b>0.09</b>           | <b>0.029</b>     |

**Table S3. Correlation of other sources of information about COVID-19 vaccination with COVID-19 vaccination uptake.**

| Parameters                | Decision to vaccinate |                  |
|---------------------------|-----------------------|------------------|
|                           | r Value               | P Value          |
| Religion                  | 0.007                 | 0.881            |
| Trust in government       | <b>0.104</b>          | <b>0.026</b>     |
| Science opinion           | <b>0.521</b>          | <b>&lt;0.001</b> |
| Media/internet            | <b>-0.593</b>         | <b>&lt;0.001</b> |
| Anti-vaccination campaign | -0.07                 | 0.107            |
